# Supplementary material
Source: publisher figshare collection journal article supplement (https://acs.figshare.com/ndownloader/files/5058964)

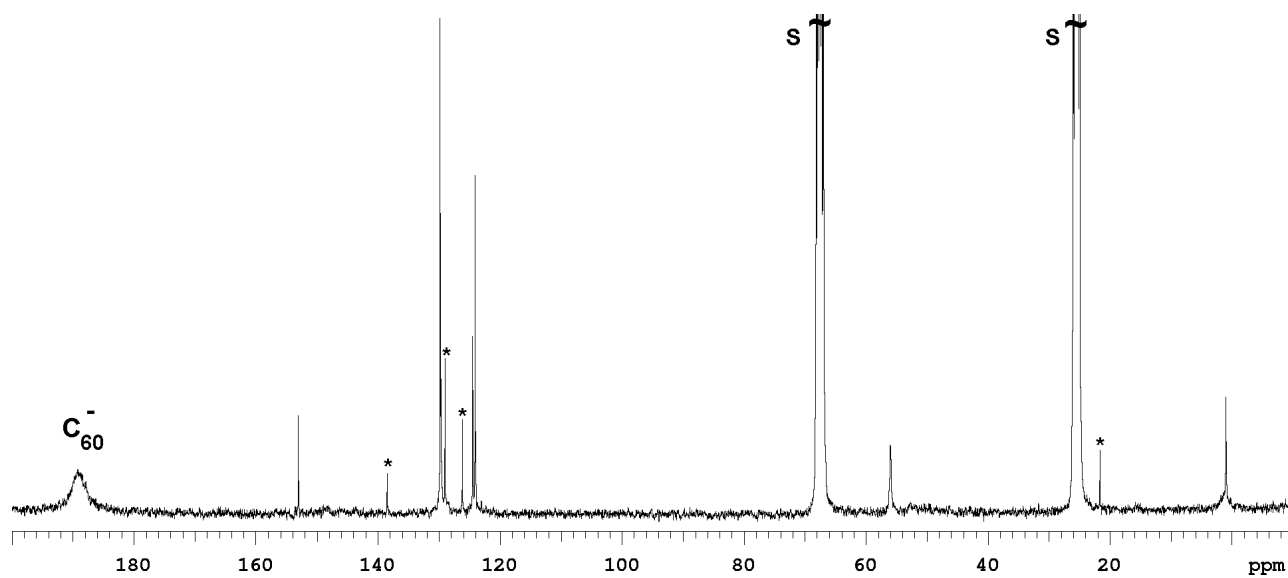

**Figure S2.**  $^{13}\text{C}$  NMR of **2** in  $d_8$ -THF. The peaks labelled with asterisk are due to toluene.

Supplement: Supplementary file 1 [file 5058964]
